# Supplementary material for: When Did the Chicken Cross the Road: Archaeological and molecular evidence for ancient chickens in Central Asia
Source: Research Square preprint supplement (doi:10.21203/rs.3.rs-1340382/v1), 2022-02-14
Supplement: Supplementary file 1 [file 17e81e45cc6380b4137fd623.docx]

**When Did the Chicken Cross the Road: Archaeological and molecular evidence for ancient chickens in Central Asia**

Carli Peters; Sören Stark; Kristine K. Richter; Basira Mir-Makhamad; Ricardo Fernandes; Farhad Maksudov; Mirzaakhmedov Sirojidin; Rahmonov Husniddin; Shevan Wilkin; Stefanie Schirmer; Kseniia Ashastina; Alisher Begmatov; Michael Frachetti; Taylor Hermes; Fiona Kidd; Andrey Omelchenko; Barbara Huber; Nicole Boivin; Shujing Wang; Pavel Lurje; Madelynn von Baeyer; Rita Dal Martello; and Robert N. Spengler III

**Supplementary Discussion 1: The Chicken Domestication Debate**

*Widely Conflicting Claims*

The domestication of the chicken remains a largely unresolved topic; zooarchaeologists and geneticists have proposed many highly divergent pathways to domestication as well as dates and centers of origin. Origins have been presented as being in Burma36, India13,15,82, Thailand (Fumihito et al. 1996), and northern China83. Others have argued for a very early domestication of chickens in southeast Asia more than nine millennia ago, with an early dispersal into northern China by 6000 BC13. Among the leading theories, introgressive hybridization has been invoked, suggesting gene transfer from *G. gallus* ssp. *sonneratii* to the modern chicken lineage84. Alternatively, a hybrid complex of multiple subspecies, excluding *G. gallus* spp. *varius*, has been proposed85. Other geneticists have proposed a hybrid complex of different subspecies originating from differing regions, “such as Yunnan, South and Southwest China and/or surrounding areas (i.e., Vietnam, Burma, and Thailand) and the Indian subcontinent”86). More recent genetic work has suggested complex hybrid origins from the crossing of at least three wild lineages, with separate domestication events across southeast Asia and India87, while others have suggested that the main genetic contribution for the modern chicken came from *G. gallus* ssp. *gallus*, with continual bidirectional gene flow between that lineage and *G. gallus* spp. *lafayettii* and a single introgression event from *G. gallus* ssp. *varius*88. Another prominent genetic model postulates that all modern chickens are monophyletic89,90. Still other geneticists have postulated an origin of domestication in “southeast Asia nearly 10,000 years ago”91. Other scholars have suggested an origin date of 5,400 years ago from southeast Asia, with multiple isolated lineages following distinct routes of dispersal34. Yet another recent mtDNA study concluded that they had identified “several local domestication events in South Asia, Southwest China and Southeast Asia”, and that their genetic data illustrated how the chicken helped early peoples colonize the Pacific92 (p.227). Most of these studies either ignore the archaeological data or dismiss it, and, despite the existence of highly contradictory conclusions, scholars tend to propagate one idea over another as if the narrative has been resolved.

The most recent modern genetic study, applying a global genomics approach, concluded that the red jungle fowl “subspecies *Gallus gallus spadiceus* whose present-day distribution is predominantly in southwestern China, northern Thailand and Myanmar” is responsible for the earliest chicken domestication, but that later genetic contributions from other subspecies are responsible for the introgression of certain traits in some lineages93. Other integrated genetic and archaeological approaches have taken some aspects of the earlier conclusions, while ignoring others, stating, for example, that: “Several domestication centres have been identified in South and South-East Asia. *Gallus gallus* is the major ancestor species, but *Gallus sonneratii* has also contributed to the genetic make-up of the domestic chicken”94 (p.197). Further disagreement has occurred over how the initial steps towards domestication unfolded, with one team of geneticists insisting that the only way for the evolutionary divergence to occur was through “intensive breeding and selection programmes”95 (p.285), whereas many other scholars have suggested that the first steps involved unconscious hybridization. Some geneticists have argued for intentional and conscious selection of higher egg-yielding birds in prehistory87,96. Other scholars evoke a complex interplay between a protracted process, continual founder effects, and a more recent selection for strong production85,96. As noted in the introduction, many historians and archaeologists have suggested that the chicken was first domesticated for sport or for ritual and not for food97. It is clear that chickens express considerable phenotypic plasticity and rapid evolvability, especially when faced with novel environments; the expedient rates of phenotypic change in these lineages are evident in recent breeding programs. Early dispersal of the birds into extreme environments also illustrates its adaptive abilities; for example, recent genetic studies have illustrated that the birds rapidly evolved hypoxia tolerance while dispersing into the high Himalaya over the past two millennia98,99.

*Dispute over the Chinese Center of Origin*

The early claims of chickens in China, notably by West and Zhou13 have long been questioned by scholars, but until recently researchers have lacked the data to disprove the claims and they are cited extensively in the literature100. In their original paper, West and Zhou13 argued that domesticated chickens were present in northern China based on zooarchaeological remains from the archaeological sites of Peiligang and Cishan, dating to roughly 6000 BC. They provide detailed measurements of tarsometatarsal lengths, noting that the ancient Chinese ones are longer than those from the wild red jungle fowl, but shorter than the ancient chicken bones of India, reasoning, therefore, that they are an intermediate form – apparently never entertaining the possibility of a bird other than the chicken. Rekindling the debate, in 2014, a publication came out in *PNAS* claiming that a team of scholars had mtDNA for domesticated chickens from the Chinese archaeological sites of Nanzhuangtou, dating back more than 10,000 years and boasting a new origin of domestication on the central plains of China83. These claims would also suggest that the Chinese chicken is one of the earliest animals to evolve domestication traits on the planet. The team not only claimed that they eliminated the possibility of the bones being from pheasants, but that they had verified that domestication occurred through the hybridization of two wild fowl subspecies, both of which have ranges nearly a thousand kilometers to the south of the site. Xiang et al.83 further supported their claims by following up on West and Zhou’s13 conclusions and providing additional genetic evidence for domesticated chickens at Cishan and Peiligang, dating to more than 7,000 years ago.

Despite the fact that spurious early domestication papers are frequently published in *PNAS* and often brushed aside by scholars (see Miller et al.101 for a critical discussion of early millet domestication papers in PNAS and Spengler et al.102 for a similar discussion about early rice domestication papers in the same journal), the scholarly community responded rapidly to the new chicken claims. Peng et al.103 were the first to question the claims, disputing the ability of geneticists to verify that the bones were from a domesticated species, given the short mtDNA sequence, to which Xiang et al.104 replied in agreement that their genetic methods were inadequate. However, they still defended their overall conclusion by stating: “Even if the mtDNA sequences from Nanzhuangtou and Cishan are from wild junglefowl populations, they support the conclusion that chicken domestication would have been possible in northern China at that time.”104 (p.E1973). Xiang et al.104 also rebutted with the age-old tactic among archaeologists of claiming that critiques of their hypothesis represent a disregarding of the archaeological contexts. Interestingly, other scholars questioned the early evidence for chicken domestication in China as well. Peters et al.105 largely questioned the claim based on rational grounds, but also using traditional zooarchaeological methods to suggest that the bones may still be from pheasants despite the genetic evidence presented in the original paper.

Stepping outside the *PNAS* venue, more reliable assessments have subsequently been presented, based on osteological morphology. One team of specialists pushed the idea that the early remains from Shenmingpu in Henan were from ring-necked pheasants (*Phasianus colchicus*; Deng et al.106). A year later, a much more detailed study, based on well-established morphological approaches in zooarchaeology, was published in the *Journal of Archaeological Science*. In this study, a team of scholars analyzed 1,831 bird bones, 429 of which were previously recorded as domesticated chickens; the bones came from 18 different Neolithic and early Bronze Age sites in central and northern China107. They verified that there was no evidence for early chickens in northern China, but extensive remains of pheasants. Peters et al.108 also provided a critical review of the claims of early Chinese domestication and disputed the paleoclimatic assessments from the original debate, which had implied that the red jungle fowl may have existed as far north as the central China plains. Following up on this debate, a new mtDNA analysis of the earliest purported chickens from the Dadiwan site in northern China identified the species as pheasant (*P. colchicus*109. Fascinatingly, the isotope values on the Dadiwan pheasant bones suggest that they were living on a diet high in C4 plants, presumably millet, and they may have been either in an early state of cultivation or pests living on the margins of millet fields. While the claims for early chickens in China seem to be effectively refuted, Deng et al.106 relying on the *Zou Zhuan* (*The Zuo Tradition*), suggest that domesticated chickens spread into central China by sometime between 722 to 468 BC. Ultimately, the best evidence for the origins of chickens in China comes from historical texts.

*A Lack of Resolution*

The difficulties in identifying a pathway to domestication rest in the close genetic signals of closely related wild subspecies and considerable gene flow over time, including continuing introgression of genes from wild birds. Additionally, the dearth of early archaeological data and the similarities between chicken bones and other large birds, especially Galliformes, has led to considerable speculation among archaeologists, art historians, and historians regarding the cultural role of the bird through time, its routes of dispersal, and its earliest appearance in specific regions. Individual Mendelian alleles for domestication traits in chickens have also been difficult to identify, notably a recent aDNA study illustrated that the well-recognized yellow-skin-color gene and another gene often associated with domestication (TSHIR, the thyroid-stimulating hormone receptor, thought to link to photoperiod sensitivity and reproduction) only fully introgressed into the European populations ca. 500 years ago110. At present, it is unclear what the earliest reliable evidence for cultivated chickens is, and the remains from Mohenjo-Daro are often referenced as conclusive evidence for domesticated chickens in the Indus by 2000 BC13. However, the discovery consists of only a few bird bones, recovered from the upper levels of the site roughly a century ago, which were deduced to date to the early second millennium BC based on stratigraphic association111. There were no reports of chicken remains recovered from earlier layers at the site, the bones were not directly dated, and not photographed, nor did good zooarchaeological criteria for identification exist at the time they were recovered.

Even if the Mohenjo-Daro remains are four millennia old and properly identified, they do not exclude the possibility of earlier and further east cultivation. Even beyond the Indus, a disconcerting number of the very early data points for chickens come from observations made more than half century ago, and the entire topic is desperately in need of reevaluation. As with many domesticated organisms, the molecular clock results are not overly reliable, providing a range for the earliest divergence of the domesticated chicken from its wild lineage of ca. 9500 ± 3300 years ago93. Chicken is sometimes reported from sites further east in India, such as Shikarpur in Gujarat, but at this site, chicken bones are rare and, like Mohenjo-Daro, are only reported as being present in the upper levels at the site, presumably also dating to the end of the Harappan period, during the early second millennium BC112. In many of these sites, chicken is not considered an important animal, and archaeologists focus more on larger animal bones; additionally, there are so many large wild birds native to the region that identification of an early stage of the domesticated chicken is extremely difficult and few bones could be considered diagnostic. Despite the lack of data, many scholars suggest that chicken simultaneously dispersed along a: 1) southern sea route; and 2) southern Himalayan and trans-Iranian route on its westward journey16,36. Interestingly, these two routes of dispersal have just been presented as the same two routes that rice (*Oryza sativa*) spread along at roughly the same period, ca. 2,000 years ago102. While the earliest chapters in the chicken story remain unclear, there are more reliable data for reconstructing the later chapters.

**Supplementary Discussion 2: Rapid Dissemination across the Ancient World**

As with the earliest evidence for domestication, there are many claims of early discoveries of domesticated chickens in various regions of Eurasia; these claims represent varying levels of reliability, ultimately leaving many large gaps in the narrative of chicken dispersal. While dates for chickens in southwest Asia or the eastern Mediterranean prior to the mid-second millennium BC have been presented, they are rare and poorly reported. These early dates cannot be refuted without further investigation, but robust data for chickens across this region only dates to the mid- to late second millennium BC. As one example, Meadow68 suggested that chicken bones were present at Tepe Yahya in Iran dating to 3900 – 3800 BC, but noted that they are only prominent in the assemblage after 1000 BC. A handful of sites in Turkey and Syria have also provided possible early evidence for chickens2. At the site of ‘Umaryi in Jordan early chicken bones have been reported from the late third millennium BC2. West and Zhou13 compiled a handful of reports from archaeological studies in Europe that claim to have very early chicken remains, and it is clear that a large-scale and detailed reassessment of these claims in needed. One of the few attempts to reassess one of the early claims was conducted on a bundle of bird bones recovered from an 18th Dynasty (1320 BC) tomb in Egypt, the previously reported chicken bones were reassessed as belonging to a mix of waterfowl and predatory birds113. It should also be pointed out that large wild birds are prominent in many of these early zooarchaeological assemblages, complicating identifications. Other similar birds that could be mistaken for chickens in South Asia, notably Indian sites, include numerous species in the partridge (Perdicinae) and pheasants and jungle fowl (Phasianinae) subfamilies of the Phasianidae, the cotton teal (*Nettapus coromandelianus*) and an impressive array of waterfowl, as well as egrets (Ardeidae), ibis (Threskiornithidae), storks (Ciconiidae), and the flamingo (*Phoenicopterus roseus*). Other large South Asian birds include the crow (*Corvus splendens*, and other relatives e.g. *C. macrorhynchos*), bulbuls (Pycnonotidae), a wide variety of raptors, not to mention other raised exotic birds, such as the peacock, geese, and ducks. In arid Central Asia and the Iranian Plateau, it would be difficult to differentiate between a chicken bone and a bone of several species of Pteroclidae (sandgrouses), chukar partridge (*Alectoris chukar*), or the houbara bustard (*Chlamydotis undulata*), all of which have a long history of being hunted for food in this part of the world. All of these taxa are effectively excluded using peptide mass fingerprinting.

While not discrediting pre-second millennium BC claims of chickens in West Asia and Europe, we do believe that a more conservative look at the zooarchaeological records suggests that chickens may have begun to appear in very low abundances only in the mid to late second millennium BC. At the Hesban site, also in Jordan, chicken bones have been reported to date between 1200 – 900 BC. The earliest reported chicken from Israel consists of a single bone from Shiloh dated to 1650 – 1550 BC2. The rarity of these late second millennium BC finds is also informative; for example, out of nearly 5,500 identified bones from Tel Michal, only one chicken bone was reported114; from Tel Lachish, out of more than 27,000 identified bones, many of which were from birds, two were identified as chicken, both coming from late occupation layers71. In sharp contrast, at the Hellenistic site of Tel Kedesh in northern Israel, in the last centuries BC, 310 chicken bones were recovered and Redding2 argued, based on the prominence of cortical bones, that they are linked to more prominent egg laying.

While the chicken appears to have been known and traded in the eastern Mediterranean at least as far back as the mid-second millennium BC2,97, the earliest indisputable evidence for the bird taking on a significant role in the dietary economy comes from the site of Maresha, Israel, a Hellenistic village dating between the fourth and second centuries BC1. The Bash-Tepa eggshells presented in this paper are contemporary with the bones from Maresha suggesting a prominent chicken egg production system in the Bukhara Oasis in Uzbekistan, seemingly suggesting that the rearing of chickens for eggs rapidly spread across the eastern Mediterranean during the fourth century BC. Chicken bones have been recorded at archaeological sites around the Mediterranean from as early as the eighth century BC, notably at Phoenician sites in Iberia76,115,116. Detailed and indisputable images of roosters, often in fighting scenes, are present on Greek pottery, notably Corinthian wears, dating back to 620 BC7. The bird was clearly present across Greece, France, and southern Europe through the second half of the first millennium BC; although, it remains a rare occurrence in these sites until the last centuries BC75,117. Likewise, Aristophanes118 in, *The Birds*, refers to the chicken as the Median bird. Additionally, Theognis of Megara mentions the rooster around the sixth century BC 119. It remains likely that these rare finds of pre-Hellenistic chickens were raised for meat, ritual purposes, or as exotic prestige items, as opposed to egg laying.

The prominence of chickens across the ancient world increases immensely after the Greek expansions eastwards and even more so with the Roman expansions. The prominence of chickens in Classical texts and archaeological sites are far too numerous to summarize in this article. The map in Figure 1 illustrates this dissemination process, but it does not present an exhaustive survey of the archaeological chicken bones recovered from Roman sites, because chickens were clearly a fixture at all villages, cities, and small homesteads across the Empire. The most cited historical reference to the timing and routes of chicken dispersal comes from the Greek author, Athenaeus (third century AD), who claimed to be referencing an earlier source by Cratinus in referring to the bird as the Persian bird. References to roosters or domesticated chickens more broadly, are too numerous in Classical Roman texts to enumerate here. As a few select examples, there are references to chickens by Pliny the Elder, Virgil, Pliny the Younger120, Varro121, and Cicero12, most of whom make reference to cock fights. However, historians have emphasized the economic importance of chickens in the Roman Empire, suggesting that they were being cultivated on a large scale and that specialized poultry farms existed17. The most often cited supporting text for this claim comes from Columella (ca. AD 60), who described in detail the practices of poultry raising in the Greco-Roman world18.

While many claims for early chickens in Egypt have been made based on images of birds in art or hieroglyphics2. Chickens are present in the faunal assemblage from Berenike during the Ptolemaic period, but they increase in abundance threefold during the Roman period65. One pre-Ptolemaic report of possible chicken bones in Egypt comes from the site of Buto (685 – 525 BC122). Clearer chicken evidence comes from Coptos in Greco-Roman sediments (150 BC to AD 30072). Robust evidence for chickens in Egypt during the Roman period comes from sites, such as Tell Maskhuta (AD400123) and Quseir (first century BC to early sixth century AD66). Some archaeologists working in Egypt have argued that the chicken was introduced early, lost, and then reintroduced during the Ptolemaic period15, others dismiss the fragmentary earlier evidence, claiming that the chicken was first introduced to Egypt with the Greeks113. There is, however, good evidence for chickens in Central Africa earlier; at the pre-Aksumite site of Mezber, dating between 800 and 400 BC, in Ethiopia in the Horn of Africa16.

Scholars have suggested that the chicken may have first spread into the Mediterranean with Phoenician sea traders to Greece and the Iberian Peninsula around 900 – 700 BC110; although, clear evidence for this is lacking. Zooarchaeological remains for chickens suggest that it spread into Central Europe by the Hallstatt C–D period ca. 800 – 475 BC110. One site that has provided strong evidence for pre-Roman chickens in Central Europe is Manching, a Celtic oppidum (Figure 1), which has provided a massive assemblage of zooarchaeological remains, including rare finds of chicken bones dating to the La Tène period (475 – 30 BC63). After the Roman occupation of the site, chicken became more prominent in the assemblage. Chicken remains are identified in very low frequencies, notably at southern village sites dating to the last two centuries BC124. Although, some scholars have argued that chickens were kept more for ritual offerings than as food in pre-Roman Britain26. The chicken has been identified at Roman ports as far afield as Arbeia, England, from between AD 150 – 45014. A large-scale zooarchaeological synthesis of chicken remains from the British Isles notes that they became slightly more prominent during the Roman period, but were most prominent in graves, shrines, and ritual deposits26. Chickens have been identified in other areas of the Roman Empire, including Italy78 northern France74, Switzerland125, and northern Africa126, and even far northern Europe127. A recent synthesis of the zooarchaeological literature for Russia has illustrated that the chicken spread into western Russia and the river valleys of the steppe by 1,000 years ago and aDNA data suggested that it spread into the region from Europe rather than West Asia128.

**Supplementary Discussion 3: The Sites Discussed in this Manuscript**

*Bash Tepa*

Bash Tepa is a Hellenistic fortified site, possibly a citadel that was once surrounded by agricultural land that has now been deflated by wind. Presumably, occupation within the fortifications would have been restricted to more elite members of the population, but the excavators suggest that the social function of the fortifications may have changed over time129. Later occupations consisted of pit-house structures built into the top of the mound site, and Stark et al.130 noted that the dates cluster with a probability of 99.7% (2σ), between 350 and 50 BC. Ceramics and other material culture attest to local-scale exchange and interaction, notably with Sogdiana, but also with Hellenistic Bactria and Khoresam129,130. Eggshell fragments were found across all tested contexts at the site, including pithouses dug into the main site structure. The fill in these pithouses likely originated away from the site center, but consist of cultural sediments.

*Tashbulak*

Tashbulak is a village or urban site located at high elevation (2200masl) in the Pamir Mountains of Uzbekistan, and was excavated over several years from 2016 through 2018131. An extensive radiocarbon dating campaign, confirmed by coins found at the site, places occupation around the late tenth century. Eggshell fragments were recovered from 5 of 22 heavy fraction samples from the Tashbulak site, totaling 95 fragments; although, 86 of those fragments came from one sample (FS26). Two excavation units were sampled, one in the citadel at the site, which contained a single shell fragment and the other from a series of contemporaneous strata in an adjacent midden, where the remaining fragments were recovered. It is worth noting that these fragments come from multiple flotation samples collected from different parts of the site, including multiple depositional layers in the central midden.

*Afrasiab*

Afrasiab was permanently inhabited from pre-Achaemenid periods to 1221; it was a capital of Sogdiana and a central hub on the ancient Silk Road trade routes. In the last centuries of its existence it was one of two capitals (along with Bukhara) of the Samanid and Qarakhanid states. One sediment sample with a total volume of 255 L has been collected from a midden within a domestic context, approximately 500 m from the Afrasiab citadel in 2019. Radiocarbon dating of three samples from the midden range from 800 to 1100, confirming the assumptions of the excavators based on material culture. The occupation area where the sample was collected would have represented economically prosperous members of the empire living in the core of its capital, but not elite enough to reside in the palace residence itself. Egg shells were abundant in this assemblage; in total 855 eggshell fragments have been recovered from the heavy fraction with a density of 3.35 eggshell fragments per liter. Seven eggshells out of 855 showed signs of carbonization.

*Paykend*

Paykend was a major urban hub on the ancient trade routes and likely served as a center of commerce on the edge of the Bukhara Oasis. The site complex went through numerous social and functional changes over time, and we, therefore, have divided the complex into three functionally and temporally distinct components. Sediment samples were collected from many cultural layers at Paykend. The earliest clear occupation levels at the site (Paykend 1) consist of a fortified citadel similar to and roughly contemporaneous with that of Bash Tepa, but larger in area. Two samples were collected from the earliest cultural layers, dating to the 3rd-2nd centuries BC. Eleven eggshells were recovered in one of two samples coming from the area near the citadel with a total density of 0.23 eggshell fragments per liter of sediment. In addition to samples from the Hellenistic period, five samples were taken from the cultural layers dating to the 3rd-4th centuries AD (also Paykend 1). The Paykend 2 samples have been dated to the Qarakhanid period coming from the Shakhristan II, roughly contemporaneous with the one sampled at Afrasiab. Eggshell were present in only two of these samples. We also collected 20 sediment samples from Rabat-4 at Paykend 3 dated to the 10th-12th centuries AD (the Qarakahanid period). The use of this rabat or caravansary appears to continue after the abandonment of the neighboring urban center, and likely continued to serve as a rest stop for merchant caravans. The ubiquity of eggshells in these was 45 percent (9 out 20 samples in Paykend 3). Eggshells in Paykend 3 (Rabat) were recovered only in the samples taking from cooking/tandyr ovens.

*Panjakent*

Ancient Panjakent is a well-known Sogdian city located in western Tajikistan on the southern bank of the Zarafshan River. The Sogdian city emerged in the 5th century AD and remained a prosperous urban center until the 8th century AD and was abandoned after the Arabic Expansions. The Panjakent site consists of two distinct parts: the main city Panjakent and citadel on a separate hill with the sping of Kainar underneath. It probably emerged several centuries earlier. In total, 81 eggshell fragments were recovered during the flotation of samples from the citadel (n=25), and in the main city (n=56) the shells predominantly came from Objects VIC and XII-B. Density of eggshell fragments per liter of sediment was 0.2 in both the citadel and the main city.

*Kafir Kala*

The large fortified tell site of Kafir Kala is located 12 kilometers south of the modern city of Samarkand. The fortifications have been used since at least the 4th century AD and continued to be occupied through the Qarakhanid period. Eggshells were handpicked from the site during the 2020 excavations and date to the Samanid period, likely in the eight century AD.

*Kuk-Tosh*

Kuk-Tosh, also known aspre-Mongol Panjakent, is located in the eastern portion of the modern city of Panjakent and was occupied from the Samanid to the Qarakhanid periods (roughly 9 – 12th centuries AD). Based on cultural artifacts, notably glass132 and ceramics133, Kuk-Tosh inhabitants took an active role inexpanding trade and economic ties in Panjakent. During the pilot archaeobotanical study, 2,847 eggshell fragments were recovered, almost 99.6% of those eggshells came from the cesspit deposit.

*Sanjar-Shah*

Sanjar-Shah is located 12 km to the east of Panjakent in western Tajikistan. Sanjar-Shah is the largest settlement in the neighborhood of Panjakent; moreover, the city was likely part of the city-state of Panjakent134. The occupation layers dated preliminarily to the 5 – 9th centuries AD in Sanjar-Shah. In 2021, five sediment samples were taken and floated. A total of 65.5 L of floated sediment yielded 26 eggshell fragments with a density of 0.39 eggshell fragments per liter of sediment. Eggshell fragments were present in four out of five samples. The majority of eggshells (n=19) came from the sample that represents the tandyr filling.

*Bukhara*

Rescue excavations have been carried out just to the east of the citadel (the Arc) of medieval Bukhara, one of the two capital cities of the Qarakhanid Empire (along with Afrasiab – also in this study). The excavated area may either have represented an elite residential neighborhood or a market bazaar. Radiocarbon dates, and material culture remains both securely place occupation of the area around the end of the Samanid and through the Qarakhanid phases, from the ninth through the eleventh centuries AD. Within which, 871 eggshell fragments were recovered. These shell fragments have been recovered both from cesspits and sediment layers, suggesting that eggs were prominent in the diet.

*Burial LVD-HA-K7*

Burial mound LVD-HA-K7 was recently excavated in the Kyzyl Kum Desert, on the edge of the Bukhara Oasis, and eggs appear to have been part of the mortuary offerings. A small pile of eggshells was recovered from inside the burial chamber, in the southeastern corner, among ceramics (bowls, goblets, etc.) and other evidence for food offerings. Interestingly, a few decades earlier, a pile of eggshells was recovered from another burial in the same are, burial HZR-K7, and the eggshells were referred to as chicken and found in association with shellfish. The offerings were recovered from close to the elbow of a human skeleton135. Both contexts have been identified as nomadic kurgans or burial mounds and thought to belong to a different people from those who occupied the oasis cities of Bukhara, such as Paykend and Bukhara proper. Interestingly, the eggshell fragment from LVD-HA-K7 turned out to be one of the two tested fragments that were not from chicken and instead appear to be from a waterfowl. We assume that they represent an example of people collecting wild migratory bird eggs as the birds passed through the marshes of the Bukhara Oasis.

**Supplementary Discussion 4: Data and Results of Peptide Mass Fingerprinting of the** **Eggshells**

Published references for peptide mass fingerprints of eggshells are highly biased toward European taxa. Therefore, we took extra measures to ensure that there are no wild species, which share markers with domesticated chickens. According to Avibase (avibase.bsc-eoc.org) seven Galliformes species are present in Uzbekistan all of which are in Phasianidae. Six are in the subfamily Perdicinae: partridge (*Ammoperdix griseogularis*); chukar (*Alectoris chukar*); common quail (*Coturnix coturnix*); Himalayan snowcock (*Tetraogallus himalayensis*); gray partridge (*Perdix perdix*); and daurian partridge (*P. dauurica*). The seventh species, ring-necked pheasant (*Phasianus colchicus*), is in the same subfamily as the chicken (Phasianinae). Published markers are available for the common quail and the ring-necked pheasant19. Genetic data from the Chinese bamboo-partridge (*Bambusicola thoracicus*), in the subfamily Perdicinae, was also used for comparison.

LC-MS/MS analysis yielded high quality MS/MS spectral data. In total, 52 unique proteins were identified in the samples. The majority of the peptide sequences were identified as belonging to eggshell-specific proteins (ovocleidin-116, ovocleidin-17, oxocalyxin-32, ovalbumin, and clusterin) or egg-tissue proteins (ovotransferrin and ovomucoid) matching to sequences from *Gallus gallus*. Sequences were identified as chicken after passing Blast search for uniqueness, and were cross-checked against sequence data and published markers for the Galliform species. Peptides identified as corresponding to masses in the MALDI were double checked as being unique peptides for their precursor masses in the LC-MS/MS data. These data allowed for confirmation that sequences used as markers for chicken were not present in the other closely related species from the same (sub)family. The closest relative to chicken present in Uzbekistan, ring-necked pheasant, can be distinguished from chicken using published markers. Therefore, even without having references from local wild taxa, we can securely use these MALDI peptide markers to identify a sample as chicken as opposed to local, wild taxa.

**References**

82 Brown, E. *Poultry Breeding and Production* (Ernst Benn, London, 1929).

83 Xiang, H. *et al.* Early Holocene chicken domestication in northern China. *PNAS* **111**, 17564-17569, doi:10.1073/pnas.1411882111 (2014).

84 Eriksson, J. *et al.* Identification of the Yellow Skin Gene Reveals a Hybrid Origin of the Domestic Chicken. *PLOS Genet.* **4**, e1000010, doi:10.1371/journal.pgen.1000010 (2008).

85 Nishibori, M., Shimogiri, T., Hayashi, T. & Yasue, H. Molecular evidence for hybridization of species in the genus Gallus except for Gallus varius. *Anim. Genet.* **36**, 367-375, doi:10.1111/j.1365-2052.2005.01318.x (2005).

86 Liu, Y.-P. *et al.* Multiple maternal origins of chickens: Out of the Asian jungles. *Mol. Phylogenet. Evol.* **38**, 12-19, doi:10.1016/j.ympev.2005.09.014 (2006).

87 Kanginakudru, S., Metta, M., Jakati, R. D. & Nagaraju, J. Genetic evidence from Indian red jungle fowl corroborates multiple domestication of modern day chicken. *BMC Evol. Biol.* **8**, 174, doi:10.1186/1471-2148-8-174 (2008).

88 Lawal, R. A. *et al.* The wild species genome ancestry of domestic chickens. *BMC Biol.* **18**, 13, doi:10.1186/s12915-020-0738-1 (2020).

89 Fumihito, A. *et al.* One subspecies of the red junglefowl (*Gallus gallus gallus*) suffices as the matriarchic ancestor of all domestic breeds. *PNAS* **91**, 12505-12509, doi:10.1073/pnas.91.26.12505 (1994).

90 Fumihito, A. *et al.* Monophyletic origin and unique dispersal patterns of domestic fowls. *PNAS* **93**, 6792-6795, doi:10.1073/pnas.93.13.6792 (1996).

91 Sawai, H. *et al.* The Origin and Genetic Variation of Domestic Chickens with Special Reference to Junglefowls *Gallus g. gallus* and *G. varius*. *PLOS ONE* **5**, e10639, doi:10.1371/journal.pone.0010639 (2010).

92 Miao, Y. W. *et al.* Chicken domestication: an updated perspective based on mitochondrial genomes. *Heredity* **110**, 277-282, doi:10.1038/hdy.2012.83 (2013).

93 Wang, M.-S. *et al.* 863 genomes reveal the origin and domestication of chicken. *Cell Res.* **30**, 693-701, doi:10.1038/s41422-020-0349-y (2020).

94 Tixier-Boichard, M., Bed'Hom, B. & Rognon, X. Chicken domestication: From archaeology to genomics. *C. R. Biol.* **334**, 197-204, doi:10.1016/j.crvi.2010.12.012 (2011).

95 Al-Nasser, A. *et al.* Overview of chicken taxonomy and domestication. *Poult. Sci. J.* **63**, 285-300, doi:10.1017/S004393390700147X (2007).

96 Ahmad, H. I. *et al.* The Domestication Makeup: Evolution, Survival, and Challenges. *Front. Ecol. Evol.* **8**, doi:10.3389/fevo.2020.00103 (2020).

97 Sykes, N. A social perspective on the introduction of exotic animals: the case of the chicken. *World Archaeol.* **44**, 158-169, doi:10.1080/00438243.2012.646104 (2012).

98 Zhang, Q. *et al.* Genome Resequencing Identifies Unique Adaptations of Tibetan Chickens to Hypoxia and High-Dose Ultraviolet Radiation in High-Altitude Environments. *Genome Biol. Evol.* **8**, 765-776, doi:10.1093/gbe/evw032 (2016).

99 Zhang, Y., Zhang, H., Zhang, B., Ling, Y. & Zhang, H. Identification of key HIF-1α target genes that regulate adaptation to hypoxic conditions in Tibetan chicken embryos. *Gene* **729**, 144321, doi:10.1016/j.gene.2019.144321 (2020).

100 Lawler, A. In Search of the Wild Chicken. *Science* **338**, 1020-1024, doi:10.1126/science.338/6110.1020 (2012).

101 Miller, N. F., Spengler, R. N. & Frachetti, M. Millet cultivation across Eurasia: Origins, spread, and the influence of seasonal climate. *Holocene* **26**, 1566-1575, doi:10.1177/0959683616641742 (2016).

102 Spengler, R. N. *et al.* A Journey to the West: The Ancient Dispersal of Rice Out of East Asia. *Rice* **14**, 83, doi:10.1186/s12284-021-00518-4 (2021).

103 Peng, M.-S., Shi, N.-N., Yao, Y.-G. & Zhang, Y.-P. Caveats about interpretation of ancient chicken mtDNAs from northern China. *PNAS* **112**, E1970-E1971, doi:10.1073/pnas.1501151112 (2015).

104 Xiang, H., Hofreiter, M. & Zhao, X. Reply to Peng et al.: Archaeological contexts should not be ignored for early chicken domestication. *PNAS* **112**, E1972-E1973, doi:10.1073/pnas.1502207112 (2015).

105 Peters, J. *et al.* Questioning new answers regarding Holocene chicken domestication in China. *PNAS* **112**, E2415, doi:10.1073/pnas.1503579112 (2015).

106 Deng, H., Yuan, J., Song, G., Wang, C. & Edu, M. Reexamination of the domestic chicken in ancient China. *Chinese Archaeol.* **14**, 189-193, doi:10.1515/char-2014-0021 (2014).

107 Edu, M. *et al.* Reevaluation of early Holocene chicken domestication in northern China. *J. Archaeol. Sci.* **67**, 25-31, doi:10.1016/j.jas.2016.01.012 (2016).

108 Peters, J., Lebrasseur, O., Deng, H. & Larson, G. Holocene cultural history of Red jungle fowl (*Gallus gallus*) and its domestic descendant in East Asia. *Quat. Sci. Rev.* **142**, 102-119, doi:10.1016/j.quascirev.2016.04.004 (2016).

109 Barton, L. *et al.* The earliest farmers of northwest China exploited grain-fed pheasants not chickens. *Sci. Rep.* **10**, doi:10.1038/s41598-020-59316-5 (2020).

110 Girdland Flink, L. *et al.* Establishing the validity of domestication genes using DNA from ancient chickens. *PNAS* **111**, 6184-6189, doi:10.1073/pnas.1308939110 (2014).

111 Sewell, R. B. S. & Guha, B. S. in *Mohenjo-Daro and the Indus Civilization II.* (ed J. Marshall) 649-673 (Arthur Probsthian, London, 1931).

112 Thomas, P. K., Joglekar, P. P., Matsushima, Y., Pawankar, S. J. & Deshpande, A. Subsistence based on animals in the Harappan culture of Gujarat, India. *Anthropozoologica* **25-26**, 767-776 (1998).

113 Macdonald, K. C. & Edwards, D. N. Chickens in Africa: the importance of Qasr Ibrim. *Antiquity* **67**, 584-590, doi:10.1017/S0003598X00045786 (1993).

114 Herzog, Z., Rapp Jr., G. & Muhly, J. D. *Excavations at Tel Michal, Israel* (University of Minnesota Press, Minneapolis, 1989).

115 Garcia Petit, L. in *International Council for Archaeozoology Bird Working Group, Feathers, Grit and Symbolism: Birds and Humans in the Ancient Old and New Worlds* (eds G. Grupe & Joris Peters) 147-163 (Marie Leidorf GmbH, Rahden/Westfalen, 2005).

116 Garcia Petit, L. in *Mouvements ou Déplacements de Populations Animales en Méditerranée au Course de l'Holocène*. *BAR International Series* (ed Armelle Gardeisen) 73-82 (Archaeopress, Oxford, 2002).

117 Prummel, W. in *International Council for Archaeozoology Bird Working Group, Feathers, Grit and Symbolism: Birds and Humans in the Ancient Old and New Worlds* (eds Grupe G. & Joris Peters) 350-360 (Marie Leidorf GmbH, Rahden/Westfalen, 2005).

118 Dunbar, N. *Aristophanes: Birds* (Oxford University Press, Oxford, 1997 [414 B.C.]).

119 Figueira, T. J. & Nagy, G. *Theognis of Megara: Poetry and the Polis* (John Hopkins University Press, Baltimore, 1985).

120 Younger, P. t. *Pliny the Younger: Complete letters* (Oxford University Press, Oxford, 2009).

121 Varro, M. T. *Varro on Farming* (Bell and Sons, London, 1912).

122 von den Driesch, A. Tierreste aus Buto im Nildelta. *Archaeofauna* **6**, 23-39 (1997).

123 Boessneck, J. Vogelknochenfunde aus dem alten Ägypten. *Annalen des Naturhistorischen Museums in Wien. Serie B für Botanik und Zoologie* **88/89**, 323-344 (1986).

124 Hambleton, E. *Review of Middle Bronze Age - Late Iron Age Faunal Assemblages from Southern Britain* (English Heritage, Portsmouth, 2008).

125 Groot, M. & Deschler-Erb, S. Market strategies in the Roman provinces: Different animal husbandry systems explored by a comparative regional approach. *J. Archaeol. Sci. Rep.* **4**, 447-460, doi:10.1016/j.jasrep.2015.10.007 (2015).

126 Tyr Fothergill, B., Linseele, V. & Lamas, S. V. in *Mobile Technologies in the Ancient Sahara and Beyond* *Trans-Saharan Archaeology* (eds A. Cuénod, C. N. Duckworth, & D. J. Mattingly) 143-182 (Cambridge University Press, Cambridge, 2020).

127 Tyrberg, T. The archaeological record of domesticated and tamed birds in Sweden. *Acta Zool. Cracov.* **45**, 215-231 (2002).

128 Lebrasseur, O. *et al.* A zooarchaeological and molecular assessment of ancient chicken remains from Russia. *Povolzhskaya Arkheologiya* **1**, 216-230 (2021).

129 Stark, S. *et al.* The Uzbek-American Expedition in Bukhara. Preliminary Report on the Third Season (2017). *Iran*, 1-51, doi:10.1080/05786967.2020.1769495 (2020).

130 Stark, S. *et al.* Bashtepa 2016: Preliminary Report of the First Season of Excavations. *Archäologische Mitteilungen aus Iran und Turan* **48**, 219-264 (2016).

131 Maksudov, F. *et al.* in *Urban Cultures of Central Asia from the Bronze Age to the Karakhanids: Learnings and conclusions from new archaeological investigations and discoveries. Proceedings of the First International Congress on Central Asian Archaeology held at the University of Bern, 4–6 February 2016* 283-306 (Harrassowitz Verlag, Bern, Germany, 2019).

132 Aminov, F. Стеклянные изделия домонгольского Пенджикента и его округи (Pre-Mongolian Glass from Panjakent and its suburbs). *Transactions of the Institute of History of Material Culture of the Russian Academy of Sciences* **23**, 103-118, doi:10.31600/2310-6557-2020-23-103-118 (2020).

133 Aminov, F. in *Традиция государства Саманидов и ее воздействие на культуры и цивилизации народов Центральной Азии и Ближнего Востока* 68-72 (TNU, Dushanbe, 2020).

134 Kurbanov, S. in *Urban Cultures of Central Asia from the Bronze Age to the Karakhanids* Vol. 12 (eds C. Baumer & M. Novák) (Harrassowitz Verlag, Wiesbaden, 2019).

135 Obel’chenko, O. V. *Kul'tura Antichnogo Sogda: Po Arkheologicheskim Dannym VII v. do n.e.- VII v. n.e.* (Main Editorial Office of Eastern Literature, Moscow, 1992).
