# Supplementary material for: When Did the Chicken Cross the Road: Archaeological and molecular evidence for ancient chickens in Central Asia
Source: Research Square preprint supplement (doi:10.21203/rs.3.rs-1340382/v1), 2022-02-14
Supplement: Supplementary file 2 [file 7a35f902b628741e1e2daac5.xlsx]

## Sheet: SI Table 1
m/z	Previously reported as	Present in MALDI all	Present in MALDI CP565	Peptide sequence	PTMs	Protein	Species	Protein assession number	BLAST CHECK	Unique in Geneious
803.4	G. gallus			GDVFIPR		Nephronectin	CHICK	A0A3Q2TSI5	Not unique
807.5	Aves	x		PVTVTYK		Fibronectin	CHICK	A0A3Q2TW07	Not unique
		x		ATVLYLK		Ovocalyxin-32	CHICK	Q90YI1	Not unique
809.5	Aves	x		DSAIMLK	M5-Dioxidation	Ovotransferrin	CHICK	P02789	Not unique
814.4	Aves	x		AASPLSIR		?	CHICK	Q53HW8	Not unique
		x		IDALLDR		Clusterin	CHICK	Q9YGP0	Not unique
825.3	Aves	x		APGVVGVAR		Ovocleidin-116	CHICK	F1NSM7	Not unique
832.5	Aves	x		FDEFFK		Glypican 4	CHICK	A0A1D5PKI8	Not unique
		x		YPYYAR		EGF like repeats and discoidin domains 3	CHICK	A0A1D5PKQ0	Not unique
		x		ALQVFVR		Nephronectin	CHICK	A0A3Q2TSI5	Not unique
		x		VVIGLFGK		Uncharacterized protein	AQUCC	A0A663DQZ2	Not unique
834.4	Aves	x		ISSAESLK		Ovalbumin	CHICK	P01012	Not unique
878.4	G. gallus		x	LAQYLDR		Cell migration inducing hyaluronidase	CHICK	F1P1G6	Not unique
			x	TPPFGGFR		Clusterin	CHICK	Q9YGP0	Galliformes
905.5	Aves	x		WSDGTAPR	W1-Oxidation	Ovocleidin-17	CHICK	Q9PRS8	CHICK	YES
920.4	Aves	x		DSAITSVTK		Ovocleidin-116	CHICK	F1NSM7	Galliformes
		x		WSDGTAPR	W1-Dioxidation	Ovocleidin-17	CHICK	Q9PRS8	CHICK	YES
		x		TEMEHSR	M3-Dioxidation	Ovocleidin-116	CHICK	F1NSM7	Not unique
923.4	Aves	x		VMVLCNR	M2-Dioxidation; C5-Carbamidomethyl	Ovomucoid	CHICK	P01005	Not unique
925.4	Aves		x	RNSAGCLR	N2-Deamidation; C6-Carbamidomethyl/Trioxidation	Clusterin	CHICK	Q9YGP0	Not unique
			x	ISCTIANR	C3-Carbamidomethyl/Trioxidation	Fibronectin	CHICK	A0A3Q2TW07	Aves
941.5	Aves	x		LFRMTQR	M4-Oxidation; Q6-Deamidation	Clusterin	CHICK	Q9YGP0	Not unique
		x		SVIAPLVSR		Procollagen-lysine, 2-oxoglutarate 5-dioxygenase 1	CHICK	P24802	Not unique
943.4	Aves	x		GCLGFFSR	C2-Carbamidomethyl	Ovocleidin-17	CHICK	Q9PRS8	CHICK	YES
948.4	Aves	x		ISLTCVQK	C5-Carbamidomethyl	Ovotransferrin	CHICK	P20789	CHICK
961.5/962.5	Aves		x	TEDPQFPK		Sulfhydryl oxidase 1	CHICK	Q8JGM4	Aves
			x	SVLFFGHR		Uncharacterized protein	BAMTH	A0A2P4T3U7	Aves
		x	x	RIVAPGGHR		Ovocleidin-116	CHICK	F1NSM7	CHICK/BAMTH	YES
971.4	Galliformes	x	x	GDSVAYGFR		Osteopontin	CHICK	P23498	Galliformes
		x	x	QELQQVVK		Uncharacterized protein	CHICK	F1NGB1	Not unique
997.6	G. gallus	x	x	VQQEVAPAR		Ovocleidin-116	CHICK	F1NSM7	CHICK	YES
		x	x	GMVVPEGHR	M2-Oxidation	Ovocleidin-116	CHICK	F1NSM7	CHICK/BAMTH	YES
		x	x	TGTVLFMGR	M7-Oxidation	Neuroserpin	CHICK	Q90935	Not unique
		x	x	LAMVYLGAK	M3-Dioxidation	Ovalbumin	CHICK	P01012	Aves
1007.5	Galliformes	x	x	EQFEDALR		Clusterin	CHICK	Q9YGP0	Not unique
		x	x	FQTAADQAR		Ovalbumin	CHICK	P01012	Aves
1018.5	Aves	x		WYPYYAR		EGF like repeats and discoidin domains 3	CHICK	A0A1D5PKQ0	Not unique
1020.6	Aves	x		CHSGSGLVGR	C1-Carbamidomethyl/Trioxidation	Clusterin	CHICK	Q9YGP0	Aves
1024.5/1025.5/1026.5	Galliformes	x	x	EAFVPPVQR	E1-Glu->pyro-Glu	Clusterin	CHICK	Q9YGP0	Galliformes
		x	x	TDAVLFFGR		?	?	?
1034.5	Aves	x	x	WYPYYAR	W1-Oxidation	EGF like repeats and discoidin domains 3	CHICK	A0A1D5PKQ0	Not unique
		x	x	VVSAAHCYK	C7-Carbamidomethyl	Trypsin	SUSSC	P00761
		x	x	TFAQGLAVAR		Glypican 4	CHICK	A0A1D5PKI8	Aves
		x	x	PGQHQILLK		Ovocleidin-116	CHICK	F1NSM7	Galliformes
		x	x	HAVVVRPEK		Ovotransferrin	CHICK	E1BQC2	Galliformes
1042.6	G. gallus	x	x	KDQLTPSPR	Q3-Deamidation	Ovotransferrin	CHICK	P20789	Galliformes
		x	x	HSIENNEVT		Osteopontin	CHICK	P23498	Not unique
		x	x	EAFVPPVQR		Clusterin	CHICK	Q9YGP0	Galliformes
1044.5	Aves	x		TDPVQSQLR	Q7-Deamidation	Clusterin	CHICK	Q9YGP0	Galliformes
1047.5	Galliformes	x	x	YFGYTGALR		Ovotransferrin	CHICK	P20789	Galliformes
1061.6	Aves	x	x	RWSDGTAPR	W2-Oxidation	Ovocleidin-17	CHICK	Q9PRS8	CHICK	YES
		x	x	SDTFLLLPR		Uncharacterized protein	BAMTH	A0A2P4SEI1	Galliformes
1063.5	Aves	x	x	APVLSDSSCK	C9-Carbamidomethyl	Trypsin	SUSSC	P00761
		x	x	IGLHRPAGSR		Ovocleidin-17	CHICK	Q9PRS8	CHICK	YES
1088.6	Aves	x		PGGCLGFFSR	C4-Carbamidomethyl/Trioxidation	Ovocleidin-17	CHICK	Q9PRS8	CHICK	YES
		x		GFPGADGVAGPK	P3-Oxidation	COL1A1	Acratocnus sp.	C0HLH3	Not unique
1106.5	Aves	x		SVVDPSVYIK		Mucin-5B	CHICK	Q98UI9	Aves
1109.5	Aves	x		VTMAVGVQSGK	M3-Dioxidation; Q8-Deamidation	Ovocleidin-116	CHICK	F1NSM7	CHICK	YES
1142.6	Aves	x	x	ICHSGSGLVGR	C2-Carbamidomethyl	Clusterin	CHICK	Q9YGP0	Galliformes/Anseranes
		x	x	QVIDVLETDK	Q1-Gln->pyro-Glu	Uncharacterized protein	CHICK	F1NGB1	Not unique
		x	x	PEVASAPSTVGK		Ovocleidin-116	CHICK	F1NSM7	CHICK	YES
		x	x	VAIGKSTDVPR		Ovocleidin-116	CHICK	F1NSM7	CHICK	YES
1150.6	Aves	x		GDTFIGYVCK	C9-Carbamidomethyl/Trioxidation	EGF like repeats and discoidin domains 3	CHICK	A0A1D5PKQ0	Not unique
		x		WDEDTGLLFLK		Cell migration inducing hyaluronidase	CHICK	F1P1G6	Not unique
		x		TDSAITSVTKK		Ovocleidin-116	CHICK	F1NSM7	CHICK	YES
		x		MVLVNAIVFK	M1-Oxidation; N5-Deamidation	Ovalbumin	CHICK	P01012	Not unique
1152.6/1153.6/1154.6	Aves	x		HITPASKGEGR		Ovocleidin-116	CHICK	F1NSM7	Galliformes
		x		TIITGLHLER		?	CHICK	Q53HW8	Galliformes
		x		IVEGECGLTGK	C6-Carbamidomethyl/Trioxidation	lg-like domain-containing protein	CHICK	A0A140T8F5	CHICK
		x		VGGMVVPEGHR	M4-Oxidation	Ovocleidin-116	CHICK	F1NSM7	CHICK/BAMTH	YES
		x		YSAPANLYVR		Protein tyrosine phosphatase receptor type F	ANAPP	A0A493T750	Not unique
		x		RVQQEVAPAR		Ovocleidin-116	CHICK	F1NSM7	CHICK	YES
		x		THISPEDEVK		Ovocleidin-116	CHICK	F1NSM7	Galliformes
		x		QTDPVQSQLR	Q1-Gln->pyro-Glu	Clusterin	CHICK	Q9YGP0	Galliformes
		x		RVQQEVAPAR	Q3-Deamidation	Ovocleidin-116	CHICK	F1NSM7	CHICK	YES
1158.6	Aves	x		ICHSGSGLVGR	C2-Carbamidomethyl; H3-Oxidation	Clusterin	CHICK	Q9YGP0	Galliformes
		x		SCPAASPLSIR	C2-Carbamidomethyl	?	CHICK	Q53HW8	Galliformes
		x		NVIDPPIYAR	N1-Deamidation	EGF like repeats and discoidin domains 3	CHICK	A0A1D5PKQ0	Aves
1167.4	Aves	x		DHPFLFCIK	C7-Carbamidomethyl/Trioxidation	Ovalbumin	CHICK	P01012	Not unique
1182.5	Aves	x		TVEVLDTDYK		Extracellular fatty acid-binding protein	CHICK	A0A1D5NW85	Galliformes
		x		WGPGSHLAAVR	W1-Dioxidation	Ovocleidin-17	CHICK	Q9PRS8	CHICK	YES
		x		VIPMGLIHNR	M4-Dioxidation; N9-Deamidation	Ovotransferrin	CHICK	E1BQC2	CHICK	YES
1193.6	Aves	x		TVTMAVGVQSGK	M4-Oxidation	Ovocleidin-116	CHICK	F1NSM7	CHICK	YES
		x		VETAVPERHR		Ovocleidin-116-like	MELGA	XP_010708028	MELGA	ONLY MELGA
1198.6	G. gallus	x	x	DYSPVCGTDGK	C6-Carbamidomethyl/Trioxidation	Trypsin inhibitor CITI-1	CHICK	P85000	Not unique
		x	x	TPGGCLGFFSR	C5-Carbamidomethyl	Ovocleidin-17	CHICK	Q9PRS8	CHICK	YES
		x	x	EMVGELLGYR	M2-Dioxidation	Protein tyrosine phosphatase receptor type F	ANAPP	A0A493T750	Aves
		x	x	REAFVPPVQR		Clusterin	CHICK	Q9YGP0	Galliformes
		x	x	AVFPSIVGRPR		Actin alpha 2	ANAPP	A0A493TVF5	Not unique
1209.6	Galliformes	x		VDAASVSEEFR		Ovalbumin	CHICK	P01012	Not unique
		x		TLHHGDSVTSR		Ovocleidin-116	CHICK	F1NSM7	CHICK/BAMTH	YES
		x		IIPWSWYGR	W4-Oxidation; W6-Oxidation	EGF like repeats and discoidin domains 3	CHICK	A0A1D5PKQ0	PASS - AVES
		x		TVTMAVGVQSGK	M4-Dioxidation	Ovocleidin-116	CHICK	F1NSM7	CHICK	YES
1224.7	G. gallus	x		ARVQQEVAPAR		Ovocleidin-116	CHICK	F1NSM7	CHICK	YES
1228.6	Galliformes	x		IDALLDREQR		Clusterin	CHICK	Q9YGP0	Galliformes
		x		NGVLVDGAVTAGR		Ovocleidin-116	CHICK	F1NSM7	CHICK	YES
		x		ANKIRDLLER	N2-Deamidation	Ovotransferrin	CHICK	E1BQC2	CHICK	YES
1239.6	Aves	x		STIITGLHLER		Uncharacterized protein	CHICK	F1P1Y2	CHICK
		x		SHITPASKGEGR		Ovocleidin-116	CHICK	F1NSM7	Galliformes
1257.6	Aves	x		GEVGTAGPERQR	Q11-Deamidation	Ovocleidin-116	CHICK	F1NSM7	Galliformes
1265.6	Aves	x		GDFETYQHIR		Uncharacterized protein	CHICK	A0A1D5PZS5	Aves
		x		ETHISPEDEVK	E1-Glu->pyro-Glu	Ovocleidin-116	CHICK	F1NSM7	Galliformes
		x		TGYLLAQVSSVK		Ovocalyxin-32	CHICK	Q90YI1	CHICK	YES
1277.7/1278.7	Aves	x		ADLSGISSAESLK		Ovalbumin-like	HALAL	XP_009919470	Aves (no Galliformes)
		x		DLQFVEVSDVK		Fibronectin	CHICK	A0A3Q2TW07	Aves
1281.6	Aves	x		DPLFPDTVACR	C10-Carbamidomethyl/Trioxidation	Uncharacterized protein	BAMTH	A0A2P4SP01	Galliformes
1291.7	Aves	x		PNAAPSALVPAGAR		Sugar fermentation stimulation protein homolog	DESAG	Q30VA9 (reverse)	Not unique
		x		GATYNIIVEALK		Fibronectin	CHICK	A0A3Q2TW07	Not unique
1293.7	G. gallus	x		GFLVSCLVDHR	C6-Carbamidomethyl/Trioxidation	Golgi apparatus protein 1	CHICK	Q02391	Aves
1309.7	G. gallus	x	x	GSTVAGGFAHLHR		Ovocleidin-116	CHICK	F1NSM7	CHICK	YES
		x	x	GTEFTVNDLQGK	N7-Deamidation	Ovotransferrin	TRFE	P20789	Galliformes
		x	x	GVVGGMVVPEGHR	M6-Oxidation	Ovocleidin-116	CHICK	F1NSM7	CHICK/BAMTH	YES
1345.7/1346.8	Galliformes	x	x	HIATNAVLFFGR		Ovalbumin	CHICK	P01012	Not unique
1503.9	G. gallus	x		VAELSSDDFHLDR		Golgi apparatus protein 1	CHICK	Q02391	Not unique
1519.9	G. gallus	x	x	VWPGAAPAPGVVGVAR	W2-Oxidation	Ovocleidin-116	CHICK	F1NSM7	CHICK/BAMTH	YES
1523.8	Aves	x	x	YPILPEYLQCVK	Q9-Deamidation; C10-Carbamidomethyl/Trioxidation	Ovalbumin	CHICK	P01012	Not unique
1551.8	Aves	x	x	DERPASYFAVAVAR		Ovotransferrin	CHICK	E1BQC2	CHICK	YES
		x	x	SAGWNIPIGTLIHR	W4-Oxidation; N5-Deamidation	Ovotransferrin	CHICK	E1BQC2	Aves
		x	x	VWPGAAPAPGVVGVAR	W2-Dioxidation; P3-Oxidation	Ovocleidin-116	CHICK	F1NSM7	CHICK/BAMTH	YES
1734.9	G. gallus	x	x	LGQAARPEVAPAPSTGGR		Ovocleidin-116	CHICK	F1NSM7	CHICK	YES
1774.8	G. gallus	x	x	ISQAVHAAHAEINEAGR	N13-Deamidation	Ovalbumin	CHICK	P01012	Not unique
		x	x	NAVVESNGTLTLSHFGK	N7-Deamidation	Ovomucoid	CHICK	P01005	Galliformes
1808.9	Galliformes	x	x	SGHIQDYQITASSVFR		EGF like repeats and discoidin domains	CHICK	A0A1D5PKQ0	Not unique
2000.1	G. gallus	x		LGGLTEMEHSRQVEQVR	M7-Dioxidation	Ovocleidin-116	CHICK	F1NSM7	CHICK	YES
2170	Aves	x	x	AQQEVAPVPSMVVETVAPER	Q2-Deamidation; M11-Dioxidation	Ovocleidin-116	CHICK	F1NSM7	CHICK	YES
