# Supplementary material for: When Did the Chicken Cross the Road: Archaeological and molecular evidence for ancient chickens in Central Asia
Source: Research Square preprint supplement (doi:10.21203/rs.3.rs-1340382/v1), 2022-02-14
Supplement: Supplementary file 4 [file f841e5fa0e76185362bbc5f9.xlsx]

## Sheet: SI Table 2
Site	Number of Samples	Age of Samples	sample ID	Liters of Sediment	Number of eggshell fragments	Ubiquity (samples with shells)	Density (shells per liter)
Bash Tepa 2017		200 BC – 1 BC	FS1	13	16
		200 BC – 1 BC	FS2	7	0
		200 BC – 1 BC	FS3	12.5	10
		200 BC – 1 BC	FS4	13.5	1
		200 BC – 1 BC	FS5	13	75
		200 BC – 1 BC	FS6	28.5	24
		200 BC – 1 BC	FS7	66	53
		200 BC – 1 BC	FS8	13	2
		200 BC – 1 BC	FS9	13	4
		200 BC – 1 BC	FS10	26	0
		200 BC – 1 BC	FS11	2	0
		200 BC – 1 BC	FS13.1	12	18
		200 BC – 1 BC	FS13.2	53.5	0
		200 BC – 1 BC	FS14	20	108
		200 BC – 1 BC	FS15	46	45
		200 BC – 1 BC	FS16	13	1
subtotal	16		subtotal	352	357	0.75 (75%)	1.014
Bash Tepa 2018		200 BC – 1 BC	FS1	30	13
		200 BC – 1 BC	FS2	64	33
		200 BC – 1 BC	FS3	36.5	18
		200 BC – 1 BC	FS4	19.5	0
		200 BC – 1 BC	FS5	97	0
		200 BC – 1 BC	FS8	17.5	8
		200 BC – 1 BC	FS9	15	0
		200 BC – 1 BC	FS10	15	9
		200 BC – 1 BC	FS11	15	0
		200 BC – 1 BC	FS12	5.5	3
		200 BC – 1 BC	FS11?/27	97	0
		200 BC – 1 BC	FS28	nc	1
		200 BC – 1 BC	FS29	nc	6
		200 BC – 1 BC	FS30	nc	12
subtotal	14		subtotal	412	103	0.64 (64%)	0.25
Bash Tepa totals	30	200 BC – 1 BC		764	460	0.7 (70%)	0.602
Paykend 1 (citadel)		3rd-2nd centuries BC	FS11	37	11
		3rd-2nd centuries BC	FS32	10.5	0
		1st- 2nd century AD	FS1	9	0
		1st- 2nd century AD	FS3	26	0
		3rd-4th centuries AD	FS2	5	0
		3rd-4th centuries AD	FS4	14	3
		3rd-4th centuries AD	FS7	61	0
		3rd-4th centuries AD	FS10	108.5	6
		3rd-4th centuries AD	FS33	16.5	0
		4th-5th centuries AD	FS6	63	0
Paykend 1 (citadel) totals	10	3rd century BC- 5th century AD		350.5	20	0.3 (30%)	0.057
Panjakent citadel (Kainar)		6th century AD	FSP1	36	2
		6th century AD	FSP2	6	0
		6th century AD	FSP3	6	2
		after 620 AD	FSP10	12	1
		5-6th centuries AD	FSP13	10.5	1
		5-6th centuries AD	FSP14	6	11
		5-6th centuries AD	FSP15	16.5	4
		before 8th centuries AD	FSP16	13.5	3
		before 8th centuries AD	FSP17	10	1
Panjakent citadel (Kainar) totals	9	5-7th centuries AD		116.5	25	0.88 (88%)	0.215
Panjakent (main town)		8th century AD	FSP4	9.5	0
		722 AD	FSP5	35	0
		8th century AD	FSP6	4.5	0
		8th century AD	FSP7	61.5	14
		722AD	FSP8	42.5	10
		722 AD	FSP9	26	9
		before 722 AD	FSP11	4.5	3
		722 AD	FSP12	27	11
		mid 8th century AD	FSP18	6	0
		8th century AD	FSP19	27.5	5
		8th century AD	FSP20	20.5	4
Panjiakent (main town) totals	11	7-8th centuries AD		264.5	56	0.64 (64%)	0.211
Kafir Kala		7-9th centuries AD	AI1		1
		End of VIII period
		7-9 centuries AD	--		8
Kafir Kala Totals		7-9 centuries AD		na	9	1	na
Ming Tepa			N4		14
Ming Tepa Totals				na	14	1	na
Sanjar-Shah		8th century AD	FSS2	11.5	4
		8th century AD	FSS3	6.5	2
		8th century AD	FSS4	5.5	1
		8th century AD	FSS5	11	0
		9th century AD	FSS1	31	19
Sanjar-Shah totals	5	8-9th centuries AD		65.5	26	0.8 (80%)	0.397
Kuk-Tosh		9-12th centuries AD	FSK1	4.5	124
		9-12th centuries AD	FSK2	11	76
		9-12th centuries AD	FSK3	14.5	320
		9-12th centuries AD	FSK4	18.5	2318
		9-12th centuries AD	FSK5	17.5	9
		9-12th centuries AD	FSK6	13	0
Kuk-Tosh totals	6	9-12th centuries AD		79	2847	0.83 (83%)	36.038
Bukhara		9-12th centuries AD	FSB1	19	0
		9-12th centuries AD	FSB2	9	0
		9-12th centuries AD	FSB3	10	0
		9-12th centuries AD	FSB4	33	0
		9-12th centuries AD	FSB5	8.5	0
		9-12th centuries AD	FSB6	19.5	0
		9-12th centuries AD	FSB7	11.5	42
		9-12th centuries AD	FSB8	28	0
		9-12th centuries AD	FSB9	55.5	0
		9-12th centuries AD	FSB10	52.5	12
		9-12th centuries AD	FSB11	21	8
		9-12th centuries AD	FSB12	18	1
		9-12th centuries AD	FSB13	5.5	6
		9-12th centuries AD	FSB14	5	0
		9-12th centuries AD	FSB15	11.5	0
		9-12th centuries AD	FSB16	9	1
		9-12th centuries AD	FSB17	36	2
		9-12th centuries AD	FSB18	47.5	13
		9-12th centuries AD	FSB19	15	0
		9-12th centuries AD	FSB20	6	0
		9-12th centuries AD	FSB21	13	21
		9-12th centuries AD	FSB22	4.5	0
		9-12th centuries AD	FSB23	123.5	535
		9-12th centuries AD	FSB25	105	0
		9-12th centuries AD	FSB26	16.5	1
		9-12th centuries AD	FSB27	256	229
Bukhara totals	26	9-12th centuries AD		939.5	871	0.46 (46%)	0.927
Tashbulak	citadel	10-12th centuries AD	FS1	7.5	0
		10-12th centuries AD	FS2	8.5	0
		10-12th centuries AD	FS3	8	0
		10-12th centuries AD	FS4	7.5	0
		10-12th centuries AD	FS5	5	0
		10-12th centuries AD	FS6	7	0
		10-12th centuries AD	FS7	6.5	0
		10-12th centuries AD	FS8	7.5	0
		10-12th centuries AD	FS9	7.5	0
		10-12th centuries AD	FS10	7.5	0
		10-12th centuries AD	FS11	1	0
		10-12th centuries AD	FS12	23	0
		10-12th centuries AD	FS13	7.5	1
		10-12th centuries AD	FS17	7	0
		10-12th centuries AD	FS18	5	0
		10-12th centuries AD	FS19	7.5	0
	central midden	10-12th centuries AD	FS24	22.5	1
		10-12th centuries AD	FS25	37.5	6
		10-12th centuries AD	FS26	15	86
		10-12th centuries AD	FS31	14	0
		10-12th centuries AD	FS32	7.5	1
		10-12th centuries AD	FS37	3.5	0
Tashbulak totals	22	10-12th centuries AD		223.5	95	0.23 (23%)	0.425
Afrasiab	1	10-12th centuries AD	FSA1	255	855	1 (100%)	3.352
Paykend 2 (Shakhristan II)	2	10-12th centuries AD	FS5	7.5	0
		10-12th centuries AD	FS8	47.5	101
Paykend 2 totals		10-12th centuries AD		55	101	0.5 (50%)	1.836
Paykend 3 (Rabat-4)		10-12th centuries AD	F12	11	0
		10-12th centuries AD	F13	16	0
		10-12th centuries AD	F14	54.5	5
		10-12th centuries AD	F15	66	65
		10-12th centuries AD	F16	7	0
		10-12th centuries AD	F17	6	0
		10-12th centuries AD	F18	6.5	1
		10-12th centuries AD	F19	5	1
		10-12th centuries AD	F20	24.5	2
		10-12th centuries AD	FS21	42	5
		10-12th centuries AD	F22	4.5	0
		10-12th centuries AD	FS23	6	1
		10-12th centuries AD	FS24	5.5	0
		10-12th centuries AD	FS25	5.5	0
		10-12th centuries AD	FS26	3.5	0
		10-12th centuries AD	FS27	5.5	0
		10-12th centuries AD	FS28	12.5	0
		10-12th centuries AD	FS29	48	5
		10-12th centuries AD	FS30	12	1
		10-12th centuries AD	FS31	16	4
Paykend 2 (Rabat-4)	20	10-12th centuries AD		357.5	90	0.50 (50%)	0.251
