# Supplementary material for: When Did the Chicken Cross the Road: Archaeological and molecular evidence for ancient chickens in Central Asia
Source: Research Square preprint supplement (doi:10.21203/rs.3.rs-1340382/v1), 2022-02-14
Supplement: Supplementary file 5 [file e41ba84318d155b853b6a526.docx]

**When Did the Chicken Cross the Road: Archaeological and molecular evidence for ancient chickens in Central Asia**

Carli Peters; Sören Stark; Kristine K. Richter; Basira Mir-Makhamad; Ricardo Fernandes; Farhad Maksudov; Mirzaakhmedov Sirojidin; Rahmonov Husniddin; Shevan Wilkin; Stefanie Schirmer; Kseniia Ashastina; Alisher Begmatov; Michael Frachetti; Taylor Hermes; Fiona Kidd; Andrey Omelchenko; Barbara Huber; Nicole Boivin; Shujing Wang; Pavel Lurje; Madelynn von Baeyer; Rita Dal Martello; and Robert N. Spengler III

**Supplementary Table 1**

This file contains a total overview of all *m/z* peaks found in the eggshell samples identified as *Gallus gallus* with peptide mass fingerprinting. Proteins, peptide sequences, and post-translational modifications corresponding to these *m/z* peaks are also listed.

**Supplementary Table 2**

This file contains a full table of analyzed sediment samples (liters of sediment) and number of eggshell fragments recovered from the 12 archaeological sites included in this study.

**Supplementary Discussion**

This file contains the following four display items:

Supplementary Discussion 1: The Chicken Domestication Debate

Supplementary Discussion 2: Rapid Dissemination across the Ancient World

Supplementary Discussion 3: The Sites Discussed in this Manuscript

Supplementary Discussion 4: Data and Results of Peptide Mass Fingerprinting of the Eggshells
